# Supplementary material
Source: Springer Nature journal article supplement (https://www.springermedizin.de/resource/supplementary/12885_2010_2720_MOESM4_ESM.pdf/9461842)

(A) 1. DNA

2. cDNA

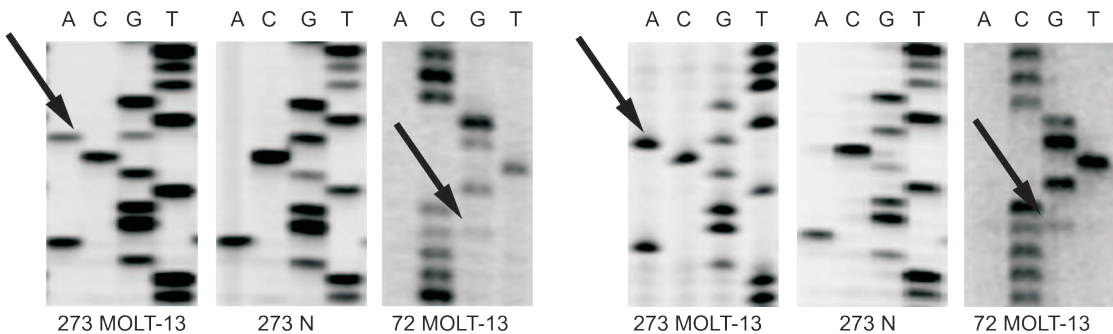

(B) 1. DNA

2. cDNA

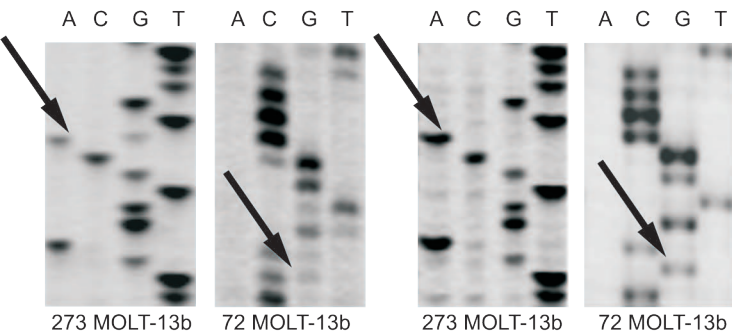

(C) 1.

2.

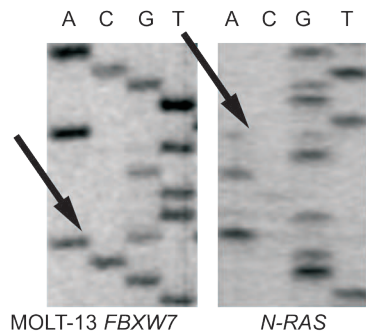

Supplement: MOESM4 [file 9461842]
